# Supplementary material for: A Time‐Dependent Fuzzy Programming Approach for the Green Multimodal Routing Problem with Rail Service Capacity Uncertainty and Road Traffic Congestion
Source: Hindawi journal article supplement (doi:10.1155/2018/8645793), 2018-01-01
Supplement: f1 [file 8645793.f1.docx]

Appendix A. Schedules of the rail services in the multimodal service network

| **Service No.** | **1** | **2** | **3** | **4** | **5** | **6** | **7** | **8** | **9** | **10** |
| --- | --- | --- | --- | --- | --- | --- | --- | --- | --- | --- |
| Origin | 2 | 3 | 4 | 5 | 5 | 6 | 7 | 11 | 11 | 11 |
| Operation start time | 9 | 2.6 | 5.8 | 81 | 81 | 20.7 | 47.5 | 46 | 47 | 45 |
| Operation cutoff time | 11 | 4.1 | 6.8 | 83.6 | 83.6 | 22.2 | 48.8 | 48 | 48 | 47.3 |
| Departure time | 12 | 4.6 | 7.3 | 84.1 | 84.1 | 22.7 | 49.8 | 48.8 | 48.8 | 48.8 |
| Destination | 8 | 8 | 8 | 9 | 10 | 8 | 8 | 9 | 10 | 12 |
| Arrival time | 42.9 | 42.9 | 42.9 | 129.2 | 129.9 | 46.5 | 84.5 | 73.9 | 74.5 | 78.3 |
| Operation start time | 43.6 | 43.6 | 43.6 | 130.4 | 130.6 | 47.7 | 95.7 | 75.1 | 75.2 | 79 |
| Distance (unit: km) | 1272 | 1358 | 1415 | 1281 | 1326 | 847 | 686 | 767 | 812 | 576 |
| Capacity (unit: TEU) | 30 | 40 | 20 | 42 | 36 | 54 | 32 | 12 | 27 | 51 |
| 45 | 55 | 36 | 50 | 45 | 61 | 44 | 20 | 35 | 60 |
| 60 | 65 | 43 | 56 | 60 | 70 | 52 | 32 | 45 | 74 |
| Operation period  (unit: day/train) | 2 | 2 | 2 | 3.5 | 3.5 | 2 | 2 | 2 | 2 | 2 |
| Operation times | 3 | 3 | 3 | 2 | 2 | 3 | 3 | 4 | 4 | 4 |

Appendix B. Travel distances and times of the road services in the multimodal service network

| **Service No.** | **Arc** | **Distance (unit: km)** | **Time-dependent travel time [unit: h, travel time (time of the day)]** |
| --- | --- | --- | --- |
| 11 | (1, 2) | 525 | 9.5 (0); 9.5 (8); 16 (9); 12 (11); 12 (14); 14 (15.5); 16 (19); 12 (21); 9.5 (22); 9.5 (24) |
| 12 | (1, 3) | 419 | 7 (0); 7 (8.5); 13 (10); 9.5 (11); 9.5 (13); 10 (14); 12 (17); 13 (19.5); 8 (21); 7 (23); 7 (24) |
| 13 | (1, 4) | 362 | 5 (0); 5 (8); 6 (9); 9 (10); 7.5 (11.5); 7.5 (13.5); 8 (15); 6 (16.5); 9 (19); 6.5 (21); 5 (22); 5 (24) |
| 14 | (1, 5) | 618 | 11.5 (0); 11.5 (7.5); 18 (9.5); 15 (12); 13 (13); 15.5 (15); 18 (18.5); 16.5 (20); 13 (21.5); 11.5 (24) |
| 15 | (1, 9) | 1790 | 19.2 (0); 19.2 (8); 26 (10); 21 (13.5); 22 (16); 26 (17.5); 26 (19); 19.2 (21.5); 19.2 (24) |
| 16 | (1, 10) | 1757 | 19 (0); 19 (7); 25 (9); 27 (10); 22 (13); 23 (15.5); 27 (18); 21 (20.5); 19 (21.5); 19 (24) |
| 17 | (1, 11) | 1083 | 18 (0); 18 (7); 19 (8.5); 27 (10); 20 (11.3); 23 (17.5); 27 (20); 20 (21.5); 18 (22); 18 (24) |
| 18 | (1, 12) | 1613 | 29 (0); 29 (8); 33 (9.5); 38 (10.5); 36 (12); 32 (14); 35 (16); 38 (19); 32 (21); 29 (22); 29 (24) |
| 19 | (7, 6) | 147 | 4.5 (0); 4.5 (8); 12 (11); 10 (11.5); 8 (13.5); 9 (15); 10.5 (16.5); 12 (18); 8 (20); 7.5 (21); 4.5 (24) |
| 20 | (7, 9) | 1158 | 12.6 (0); 12.6 (9); 20 (13.5); 15 (15.5); 17 (15.5); 20 (19); 16 (20); 13 (21.5); 12.6 (24) |
| 21 | (7, 10) | 1801 | 24.5 (0); 24.5 (8.5); 34 (11); 29 (14); 30 (15.5); 32 (17.5); 34 (19); 31 (20.5); 27 (22); 24.5 (24) |
| 22 | (7, 12) | 1222 | 13.3 (0); 13.3 (6); 15 (7.5); 23 (13); 20 (15); 21 (16.5); 23 (19); 20 (21); 17 (22.5); 13.3 (24) |
| 23 | (8, 9) | 449 | 10.9 (0); 10.9 (7.5); 12 (8); 19 (10); 17 (11.5); 15 (14); 16 (16.5); 19 (18); 19 (19.5); 17 (21.5); 10.9 (24) |
| 24 | (8, 10) | 489 | 12 (0); 12 (5.5); 14 (7.5); 21 (10); 16 (14); 17.5 (16); 21 (18.5); 18 (20); 14 (23); 12 (24) |
| 25 | (8, 12) | 558 | 14.5 (0); 14.5 (6); 16 (8); 23 (11); 18 (13.5); 19 (15); 21 (17); 23 (18.5); 19 (19.5); 17.5 (21); 14.5 (24) |

Appendix C. Information on the transportation orders in the empirical case

| **Order No.** | **O-D** | **Penalty costs**  **(Unit: ¥/ h)** | **Destination inventory costs**  **(Unit: ¥/TEU-h)** | **Volume**  **(Unit: TEU)** | **Earliest**  **release time** | **Duedate**  **time window** |
| --- | --- | --- | --- | --- | --- | --- |
| 1 | 1-9 | 200 | 5 | 16 | 28 | [130, 140] |
| 2 | 1-9 | 150 | 0 | 25 | 37 | [115, 127] |
| 3 | 1-10 | 240 | 7 | 10 | 111 | [210, 225] |
| 4 | 1-12 | 300 | 6 | 14 | 15 | [70, 78] |
| 5 | 1-12 | 250 | 6 | 27 | 90 | [160, 170] |
| 6 | 7-9 | 100 | 5 | 16 | 8 | [90, 100] |
| 7 | 7-9 | 230 | 5 | 14 | 22 | [105, 115] |
| 8 | 7-10 | 145 | 7 | 32 | 36 | [160, 172] |
| 9 | 7-12 | 280 | 0 | 28 | 39 | [190, 198] |
| 10 | 7-12 | 170 | 6 | 39 | 72 | [186; 195] |

Appendix D. Optimization results of the fuzzy simulations

| **Train No.** | **1** | **2** | **3** | **4** | **5** | **6** | **7** | **8** | **9** | **10** | **Optimization**  **result** |
| --- | --- | --- | --- | --- | --- | --- | --- | --- | --- | --- | --- |
| **Simulation**  **No.** | **Carrying capacities** | | | | | | | | | |
| **1** | 52 | 54 | 23 | 44 | 47 | 55 | 46 | 12 | 36 | 57 | 1,517,055 |
| **2** | 46 | 50 | 21 | 44 | 41 | 64 | 33 | 16 | 30 | 53 | 1,575,559 |
| **3** | 38 | 41 | 24 | 44 | 48 | 54 | 34 | 13 | 28 | 65 | 1,575,559 |
| **4** | 31 | 41 | 20 | 48 | 43 | 55 | 34 | 14 | 28 | 58 | 1,575,559 |
| **5** | 36 | 44 | 34 | 46 | 44 | 59 | 33 | 15 | 28 | 54 | 1,575,559 |
| **6** | 31 | 40 | 26 | 48 | 39 | 60 | 39 | 28 | 27 | 53 | 1,555,432 |
| **7** | 44 | 44 | 22 | 47 | 37 | 55 | 45 | 13 | 38 | 55 | 1,533,003 |
| **8** | 32 | 48 | 21 | 45 | 46 | 61 | 41 | 14 | 27 | 54 | 1,555,432 |
| **9** | 54 | 45 | 38 | 44 | 39 | 55 | 37 | 20 | 27 | 57 | 1,575,559 |
| **10** | 48 | 45 | 21 | 44 | 42 | 54 | 32 | 16 | 31 | 51 | 1,575,559 |
| **11** | 43 | 45 | 21 | 45 | 42 | 59 | 35 | 21 | 28 | 58 | 1,575,559 |
| **12** | 31 | 41 | 29 | 49 | 37 | 54 | 34 | 17 | 35 | 51 | 1,575,559 |
| **13** | 34 | 52 | 22 | 46 | 42 | 54 | 38 | 13 | 35 | 60 | 1,575,559 |
| **14** | 31 | 56 | 30 | 42 | 46 | 56 | 32 | 12 | 27 | 51 | 1,575,559 |
| **15** | 30 | 49 | 35 | 42 | 56 | 55 | 32 | 14 | 32 | 62 | 1,575,559 |
| **16** | 32 | 44 | 24 | 47 | 49 | 55 | 32 | 12 | 27 | 51 | 1,575,559 |
| **17** | 33 | 40 | 27 | 49 | 45 | 54 | 41 | 13 | 40 | 51 | 1,555,432 |
| **18** | 34 | 51 | 20 | 43 | 39 | 56 | 33 | 12 | 29 | 64 | 1,575,559 |
| **19** | 30 | 42 | 20 | 49 | 37 | 54 | 33 | 13 | 38 | 52 | 1,575,559 |
| **20** | 33 | 45 | 30 | 43 | 40 | 59 | 32 | 16 | 34 | 64 | 1,575,559 |
| **21** | 48 | 44 | 24 | 42 | 50 | 65 | 34 | 12 | 36 | 55 | 1,575,559 |
| **22** | 30 | 47 | 29 | 45 | 38 | 56 | 37 | 16 | 40 | 58 | 1,575,559 |
| **23** | 44 | 42 | 20 | 50 | 45 | 64 | 36 | 15 | 31 | 58 | 1,575,559 |
| **24** | 51 | 46 | 21 | 46 | 39 | 56 | 32 | 14 | 35 | 52 | 1,575,559 |
| **25** | 39 | 52 | 27 | 44 | 40 | 58 | 38 | 17 | 28 | 55 | 1,575,559 |
| **26** | 37 | 44 | 20 | 47 | 41 | 54 | 35 | 13 | 28 | 53 | 1,575,559 |
| **27** | 52 | 53 | 28 | 44 | 44 | 55 | 44 | 12 | 32 | 56 | 1,533,003 |
| **28** | 34 | 40 | 37 | 46 | 56 | 56 | 48 | 14 | 29 | 66 | 1,517,055 |
| **29** | 49 | 47 | 22 | 43 | 43 | 57 | 46 | 14 | 27 | 51 | 1,517,055 |
| **30** | 45 | 44 | 32 | 49 | 38 | 63 | 37 | 14 | 32 | 57 | 1,575,559 |
| **31** | 40 | 42 | 21 | 42 | 48 | 55 | 33 | 12 | 41 | 54 | 1,575,559 |
| **32** | 34 | 41 | 22 | 44 | 37 | 56 | 33 | 15 | 27 | 51 | 1,575,559 |
| **33** | 51 | 52 | 23 | 43 | 44 | 62 | 36 | 19 | 33 | 52 | 1,575,559 |
| **34** | 40 | 44 | 30 | 43 | 37 | 56 | 35 | 15 | 33 | 64 | 1,575,559 |
| **35** | 41 | 41 | 21 | 42 | 40 | 55 | 35 | 28 | 31 | 65 | 1,575,559 |
| **36** | 42 | 46 | 22 | 44 | 41 | 66 | 32 | 22 | 30 | 53 | 1,575,559 |
| **37** | 35 | 47 | 22 | 44 | 54 | 56 | 39 | 19 | 28 | 53 | 1,555,432 |
| **38** | 52 | 53 | 20 | 48 | 41 | 54 | 34 | 14 | 28 | 60 | 1,575,559 |
| **39** | 45 | 40 | 21 | 50 | 36 | 54 | 37 | 12 | 28 | 67 | 1,575,559 |
| **40** | 37 | 43 | 20 | 46 | 38 | 56 | 33 | 17 | 38 | 55 | 1,575,559 |
| **41** | 45 | 41 | 20 | 42 | 38 | 56 | 33 | 17 | 36 | 57 | 1,575,559 |
| **42** | 45 | 49 | 22 | 42 | 45 | 61 | 38 | 16 | 29 | 51 | 1,575,559 |
| **43** | 30 | 42 | 34 | 42 | 40 | 64 | 37 | 16 | 29 | 65 | 1,575,559 |
| **44** | 46 | 44 | 22 | 43 | 45 | 55 | 39 | 15 | 41 | 55 | 1,555,432 |
| **45** | 57 | 40 | 33 | 47 | 48 | 60 | 38 | 13 | 28 | 56 | 1,575,559 |
| **46** | 31 | 50 | 21 | 48 | 39 | 60 | 33 | 19 | 36 | 61 | 1,575,559 |
| **47** | 31 | 52 | 27 | 43 | 52 | 55 | 36 | 17 | 33 | 64 | 1,575,559 |
| **48** | 39 | 44 | 20 | 44 | 39 | 61 | 40 | 12 | 32 | 63 | 1,555,432 |
| **49** | 40 | 42 | 20 | 42 | 41 | 56 | 44 | 17 | 32 | 52 | 1,533,003 |
| **50** | 36 | 43 | 25 | 43 | 37 | 54 | 42 | 14 | 40 | 55 | 1,535,517 |
